# Supplementary material for: Spicy Food Intake and Dietary Factors Shape the Gut Microbiome and Metabolism of Mucin and Short-Chain Fatty Acids in Healthy Adults
Source: Research Square preprint supplement (doi:10.21203/rs.3.rs-8419849/v1), 2026-01-22
Supplement: Supplementary file 1 [file 63a99288390fe9e86b9b53c3.xlsx]

## Sheet: TableS1
TableS1. Baseline demographic, dietary, and lifestyle characteristics of participants according to alcohol and spicy food intake groups
1) Spicy food groups
	SH	SL	P-value
Sex (M:F)	12:28	75:114	0.286
Age (years)	40.7 ± 12.3	37.8 ± 10.8	0.205
Body mass index (kg/m²)	22.9 ± 4.2	22.9 ± 3.2	0.603
Stool frequency (per week)	2.7 ± 0.8	2.7 ± 0.7	0.935
Bristol stool score	3.9 ± 1.1	3.7 ± 1.2	0.47
Abdominal Pain	1.8 ± 0.4	1.8 ± 0.4	0.736
Spicy food	3.0 ± 0.2	1.7 ± 0.5	<0.001
High-fat food	1.8 ± 0.9	2.0 ± 0.8	0.355
Instant food	1.8 ± 0.8	1.7 ± 0.8	0.439
Fast food	1.1 ± 0.6	1.5 ± 0.7	0.003
Meat-to-vegetable preference ratio†	3.9 ± 2.2	4.2 ± 2.0	0.249
Alcohol (g/day)	5.4 ± 6.0	4.2 ± 5.9	0.229
Smoking	0.3 ± 0.6	0.2 ± 0.5	0.104
Vitamin	1.3 ± 0.5	1.3 ± 0.5	0.438
Probiotics	1.5 ± 0.5	1.6 ± 0.5	0.106
Antibiotics	2.0 ± 0.2	1.9 ± 0.3	0.126
Physical activity	1.9 ± 1.2	1.6 ± 1.1	0.14
Depression level	2.1 ± 0.9	1.9 ± 0.8	0.249
Sleep quality	3.3 ± 0.8	3.3 ± 0.9	0.989
Hygiene awareness	3.8 ± 0.8	3.9 ± 0.7	0.619
†Meat-to-vegetable preference ratio was assessed on a 10-point Likert scale, with higher scores indicating stronger preference for vegetables.
P-value was calculated by Kruskal-Wallis test.
2) Drink groups
	DH	DL	P-value
Sex (M:F)	55:54	32:88	<0.001
Age (years)	37.9 ± 10.2	38.6 ± 11.9	1
Body mass index (kg/m²)	23.3 ± 3.3	22.6 ± 3.5	0.069
Stool frequency (per week)	2.8 ± 0.7	2.6 ± 0.7	0.12
Bristol stool score	3.7 ± 1.2	3.8 ± 1.2	0.68
Abdominal Pain	1.9 ± 0.3	1.8 ± 0.4	0.44
Spicy food	2.0 ± 0.6	1.8 ± 0.7	0.034
High-fat food	2.1 ± 0.8	1.8 ± 0.7	0.014
Instant food	1.9 ± 0.8	1.5 ± 0.8	0.003
Fast food	1.5 ± 0.7	1.4 ± 0.7	0.06
Meat-to-vegetable preference ratio†	4.0 ± 2.0	4.4 ± 2.1	0.202
Alcohol (g/day)	8.5 ± 6.4	0.7 ± 0.8	<0.001
Smoking	0.3 ± 0.6	0.1 ± 0.3	<0.001
Vitamin	1.3 ± 0.4	1.4 ± 0.5	0.06
Probiotics	1.5 ± 0.5	1.7 ± 0.5	0.027
Antibiotics	1.9 ± 0.3	1.9 ± 0.3	0.247
Physical activity	1.8 ± 1.1	1.6 ± 1.2	0.254
Depression level	1.8 ± 0.8	2.0 ± 0.8	0.168
Sleep quality	3.3 ± 0.9	3.3 ± 0.8	0.83
Hygiene awareness	3.8 ± 0.8	4.0 ± 0.7	0.206
3) Spicy food and drink intake groups
Variable	ALL	DLSL	DHSL	DLSH	DHSH	P-value
Sex (M:F)	87:142	29:72	46:42	3:16	9:12	0.001
Age (years)	38.3 ± 11.1	38.6 ± 11.8	36.9 ± 9.5	38.8 ± 12.9	42.4 ± 11.8	0.204
Body mass index (kg/m2)	22.9 ± 3.4	22.7 ± 3.4	23.2 ± 3.0	22.2 ± 4.1	23.6 ± 4.3	0.262
Stool frequency (per week)	2.7 ± 0.7	2.6 ± 0.7	2.8 ± 0.7	2.6 ± 0.8	2.8 ± 0.9	0.472
Bristol stool score	3.7 ± 1.2	3.8 ± 1.1	3.7 ± 1.2	3.9 ± 1.3	3.9 ± 1.0	0.864
Spicy food	1.9 ± 0.7	1.6 ± 0.6	1.8 ± 0.4	3.1 ± 0.2	3.0 ± 0.2	<0.001
Sensitivity to spicy food	3.0 ± 2.5	3.5 ± 2.6	3.0 ± 2.3	2.7 ± 2.6	0.9 ± 1.5	<0.001
Pain duration to spicy food	0.8 ± 0.9	0.9 ± 1.0	0.8 ± 0.8	0.5 ± 0.7	0.2 ± 0.5	0.002
Pain onset to spicy food	1.6 ± 1.7	1.9 ± 1.7	1.6 ± 1.6	1.2 ± 1.6	0.5 ± 1.2	0.004
High-fat food	1.9 ± 0.8	1.8 ± 0.7	2.1 ± 0.8	2.0 ± 0.9	1.7 ± 0.9	0.006
Instant food	1.7 ± 0.8	1.5 ± 0.8	1.9 ± 0.8	1.6 ± 0.8	1.9 ± 0.8	0.026
Fast food	1.4 ± 0.7	1.4 ± 0.7	1.7 ± 0.7	1.3 ± 0.6	1.0 ± 0.5	<0.001
Alcohol	1.7 ± 1.0	1.0 ± 0.8	2.4 ± 0.5	1.0 ± 0.7	2.5 ± 0.5	<0.001
Alcohol intake level	1.6 ± 1.0	0.9 ± 0.8	2.3 ± 0.7	1.1 ± 0.9	2.4 ± 0.7	<0.001
Smoking	0.2 ± 0.5	0.0 ± 0.3	0.3 ± 0.6	0.2 ± 0.5	0.4 ± 0.7	0.002
Vitamin	1.3 ± 0.5	1.4 ± 0.5	1.3 ± 0.4	1.3 ± 0.5	1.2 ± 0.4	0.25
Probiotics	1.6 ± 0.5	1.7 ± 0.5	1.5 ± 0.5	1.5 ± 0.5	1.4 ± 0.5	0.063
Meat-to-vegetable preference ratio†	4.2 ± 2.0	4.4 ± 2.1	4.0 ± 1.9	4.1 ± 2.2	3.8 ± 2.3	0.417
Physical activity	1.7 ± 1.1	1.6 ± 1.1	1.7 ± 1.1	1.9 ± 1.4	2.0 ± 1.0	0.343
Depression level	1.9 ± 0.8	2.0 ± 0.8	1.8 ± 0.8	2.1 ± 0.9	2.0 ± 1.0	0.326
Sleep quality	3.3 ± 0.9	3.3 ± 0.8	3.3 ± 1.0	3.3 ± 0.8	3.2 ± 0.8	0.992
Hygiene awareness	3.9 ± 0.8	4.0 ± 0.7	3.8 ± 0.7	3.9 ± 0.6	3.7 ± 1.0	0.594

## Sheet: TableS2
TableS2. The relationships between metadata and intestinal epithelial injury biomarkers (I-FABP, L-FABP)
Meta1	Meta2	Rho	Pvalue
Age	Sex	-0.115245	0.0818173
Age	BMI	0.176701	0.00735207
Sex	BMI	-0.483135	8.52459e-15
Age	Stool Frequency	0.159484	0.0157048
Sex	Stool Frequency	-0.392023	7.85778e-10
BMI	Stool Frequency	0.307572	2.09069e-06
Age	BSS	0.0851123	0.199399
Sex	BSS	-0.0690654	0.298027
BMI	BSS	0.0802613	0.226325
Stool Frequency	BSS	0.142384	0.031251
Age	Abdominal Pain	0.196541	0.00281614
Sex	Abdominal Pain	-0.0167301	0.801192
BMI	Abdominal Pain	0.00980097	0.882731
Stool Frequency	Abdominal Pain	-0.0620384	0.350008
BSS	Abdominal Pain	-0.0223403	0.736674
Age	Preference to Spicy Food	-0.112453	0.0895458
Sex	Preference to Spicy Food	0.170517	0.00973121
BMI	Preference to Spicy Food	-0.0241359	0.716383
Stool Frequency	Preference to Spicy Food	-0.09338	0.159
BSS	Preference to Spicy Food	0.018463	0.781096
Abdominal Pain	Preference to Spicy Food	-0.00348116	0.958217
Age	Sensitivity to Spicy Food	-0.123334	0.0624225
Sex	Sensitivity to Spicy Food	0.0583418	0.379515
BMI	Sensitivity to Spicy Food	-0.0590128	0.37405
Stool Frequency	Sensitivity to Spicy Food	-0.0227539	0.731983
BSS	Sensitivity to Spicy Food	0.0272933	0.681191
Abdominal Pain	Sensitivity to Spicy Food	-0.233943	0.000356307
Preference to Spicy Food	Sensitivity to Spicy Food	-0.283957	1.27888e-05
Age	L-FABP	0.137319	0.037849
Sex	L-FABP	-0.0920816	0.164901
BMI	L-FABP	0.0744178	0.262059
Stool Frequency	L-FABP	0.120916	0.0677783
BSS	L-FABP	0.0480654	0.469188
Abdominal Pain	L-FABP	0.0217801	0.743042
Preference to Spicy Food	L-FABP	-0.0096903	0.884046
Sensitivity to Spicy Food	L-FABP	0.0847198	0.201488
Age	I-FABP	0.224708	0.00134112
Sex	I-FABP	-0.273204	8.70555e-05
BMI	I-FABP	0.191902	0.00635034
Stool Frequency	I-FABP	0.238436	0.000652893
BSS	I-FABP	0.0651512	0.358152
Abdominal Pain	I-FABP	-0.0201376	0.776603
Preference to Spicy Food	I-FABP	-0.0468397	0.509069
Sensitivity to Spicy Food	I-FABP	-0.123404	0.0809291
L-FABP	I-FABP	0.310069	7.48312e-06
Spicy Food	Meat-Vegetable Preference	-0.137697	0.037319
Spicy Food	Fatty Food	0.0676103	0.308347
Meat-Vegetable Preference	Fatty Food	-0.30138	3.41408e-06
Spicy Food	Instant Food	0.142018	0.0316925
Meat-Vegetable Preference	Instant Food	-0.223501	0.000657126
Fatty Food	Instant Food	0.41446	6.41136e-11
Spicy Food	Fast Food	-0.100875	0.127997
Meat-Vegetable Preference	Fast Food	-0.173787	0.00839969
Fatty Food	Fast Food	0.508556	1.82344e-16
Instant Food	Fast Food	0.520944	2.48554e-17
Spicy Food	Alcohol (g/day)	0.13657	0.0389181
Meat-Vegetable Preference	Alcohol (g/day)	-0.126728	0.0554947
Fatty Food	Alcohol (g/day)	0.201149	0.00222373
Instant Food	Alcohol (g/day)	0.217777	0.000908479
Fast Food	Alcohol (g/day)	0.140147	0.034034
Spicy Food	L-FABP	-0.00456255	0.945255
Meat-Vegetable Preference	L-FABP	-0.124544	0.0598754
Fatty Food	L-FABP	-0.0044783	0.946264
Instant Food	L-FABP	0.0510621	0.441903
Fast Food	L-FABP	0.0350633	0.597594
Alcohol (g/day)	L-FABP	0.0460764	0.487798
Spicy Food	I-FABP	0.00898695	0.899241
Meat-Vegetable Preference	I-FABP	-0.0305745	0.666566
Fatty Food	I-FABP	-0.0146225	0.83677
Instant Food	I-FABP	0.0818328	0.248138
Fast Food	I-FABP	-0.021146	0.765734
Alcohol (g/day)	I-FABP	0.252094	0.000305917
L-FABP	I-FABP	0.310069	7.48312e-06
Antibiotics	Vitamin	-0.0807391	0.223564
Antibiotics	Probiotics	0.0562944	0.396494
Vitamin	Probiotics	0.260767	6.50101e-05
Antibiotics	Smoking	0.0199576	0.76388
Vitamin	Smoking	-0.064363	0.332213
Probiotics	Smoking	-0.147252	0.0258614
Antibiotics	Physical Activity	0.150618	0.0226185
Vitamin	Physical Activity	-0.159646	0.015598
Probiotics	Physical Activity	-0.00341869	0.958966
Smoking	Physical Activity	0.0544804	0.411911
Antibiotics	Depression Level	-0.0436341	0.511178
Vitamin	Depression Level	0.106049	0.109479
Probiotics	Depression Level	0.145463	0.0277409
Smoking	Depression Level	0.0177065	0.789852
Physical Activity	Depression Level	-0.206504	0.00167907
Antibiotics	Sleep Quality	0.112406	0.0896797
Vitamin	Sleep Quality	-0.0431137	0.516235
Probiotics	Sleep Quality	0.0619468	0.350721
Smoking	Sleep Quality	-0.108418	0.101731
Physical Activity	Sleep Quality	0.142409	0.0312217
Depression Level	Sleep Quality	-0.351829	4.47674e-08
Antibiotics	Hygiene Awareness	-0.0105937	0.873323
Vitamin	Hygiene Awareness	-0.0334195	0.614893
Probiotics	Hygiene Awareness	-0.0157932	0.812112
Smoking	Hygiene Awareness	-0.14921	0.0239294
Physical Activity	Hygiene Awareness	0.217247	0.000935754
Depression Level	Hygiene Awareness	-0.120696	0.0682836
Sleep Quality	Hygiene Awareness	0.203818	0.00193484
Antibiotics	L-FABP	-0.0843579	0.203427
Vitamin	L-FABP	0.0384309	0.562862
Probiotics	L-FABP	0.0645314	0.330947
Smoking	L-FABP	-0.0578335	0.383689
Physical Activity	L-FABP	0.0948043	0.152711
Depression Level	L-FABP	0.0987524	0.136261
Sleep Quality	L-FABP	-0.132049	0.0459258
Hygiene Awareness	L-FABP	-0.0396034	0.550999
Antibiotics	I-FABP	0.100208	0.156952
Vitamin	I-FABP	-0.0883989	0.212068
Probiotics	I-FABP	-0.0475568	0.502598
Smoking	I-FABP	0.140001	0.047451
Physical Activity	I-FABP	0.134649	0.0566804
Depression Level	I-FABP	-0.0328854	0.643043
Sleep Quality	I-FABP	-0.0750874	0.289415
Hygiene Awareness	I-FABP	-0.0246376	0.728462
L-FABP	I-FABP	0.310069	7.48312e-06
P-value was calculated by Spearman's correlation test
